# Supplementary material for: One-dimensional copper hydroxide nitrate nanorods and nanobelts for radiochemical applications
Source: Royal Society of Chemistry journal article supplement (doi:10.1039/c2nr32439c), 2012-01-01
Supplement: c2nr32439c.pdf [file c2nr32439c.pdf]

## Supporting Information

# One-Dimensional Copper Hydroxide Nitrate Nanorods and Nanobelts for Radiochemical Applications

Bin Liu

School of Chemical and Biomedical Engineering  
Nanyang Technological University  
62 Nanyang Drive  
Singapore 637495

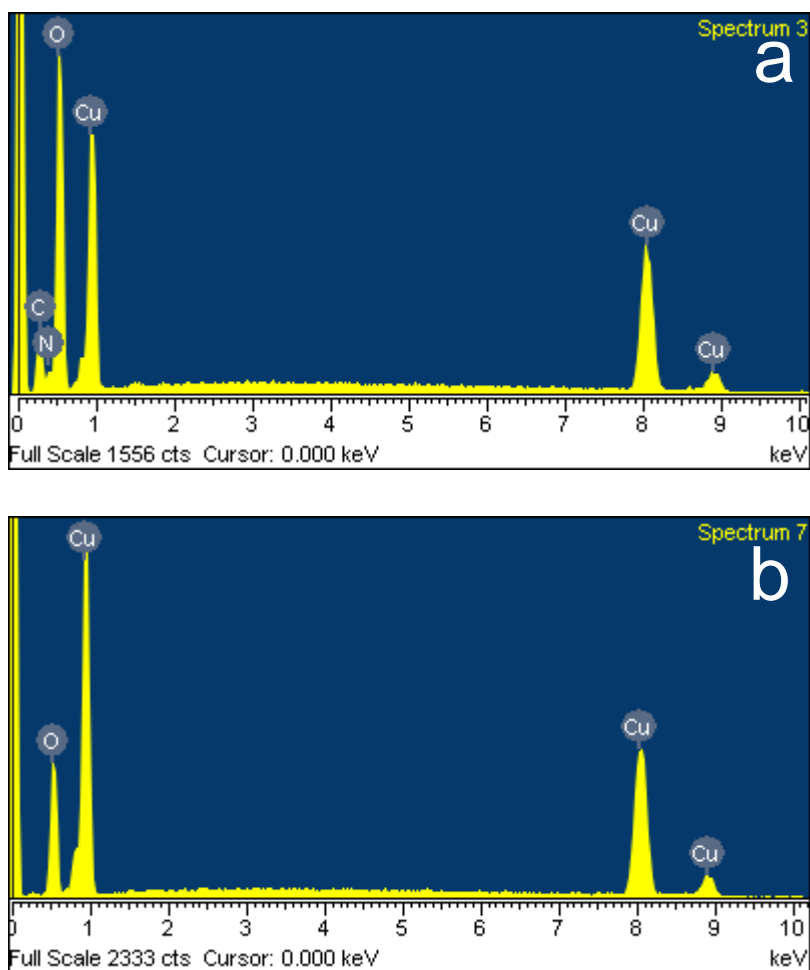

**Fig. SI-1** EDX patterns of (a) as-prepared  $\text{Cu}_2(\text{OH})_3\text{NO}_3$  nanorods and (b) calcined samples in nitrogen environment at  $600\text{ }^\circ\text{C}$  at a heating rate of  $2\text{ }^\circ\text{C min}^{-1}$ . Note: the carbon signal comes from the double-sided tape used for SEM measurement.

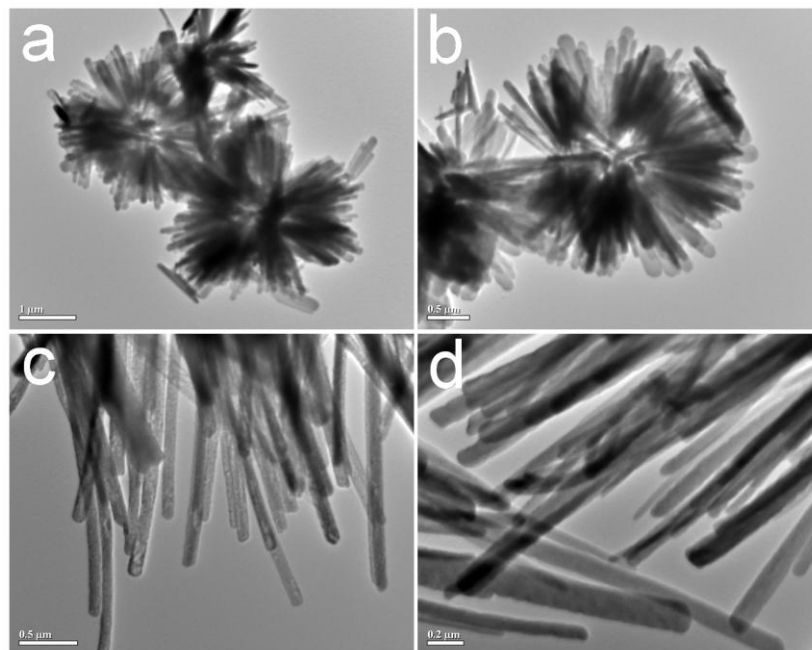

**Fig. SI-2** TEM images of  $\text{Cu}_2(\text{OH})_3\text{NO}_3$  nanorods synthesized with different amount of  $\text{Cu}(\text{NO}_3)_2 \cdot 3\text{H}_2\text{O}$ . Synthesis conditions: (a & b) 0.48 g  $\text{Cu}(\text{NO}_3)_2 \cdot 3\text{H}_2\text{O}$  + 30 ml 2-propanol, at 60 °C for 24 hours; (c & d) 0.96 g  $\text{Cu}(\text{NO}_3)_2 \cdot 3\text{H}_2\text{O}$  + 30 ml 2-propanol, at 60 °C for 24 hours.

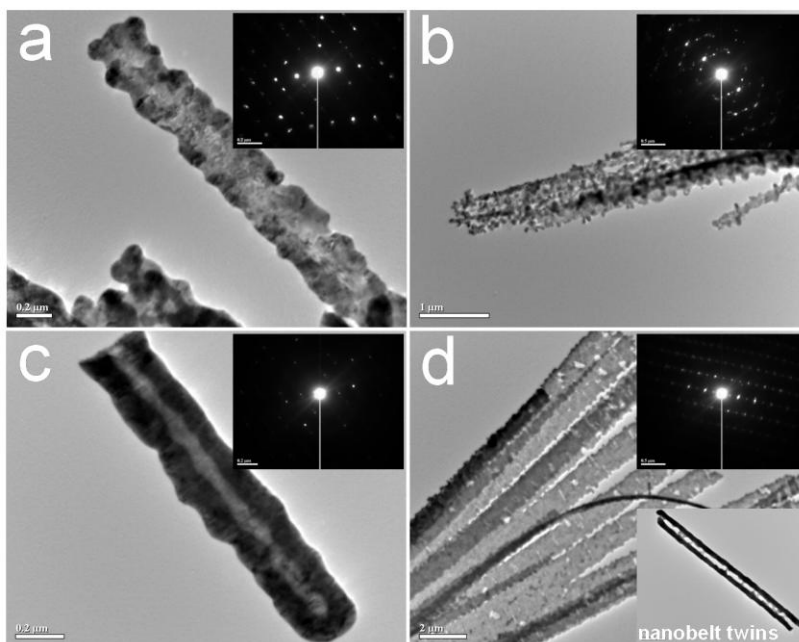

**Fig. SI-3** TEM images and the corresponding SAED patterns of  $\text{Cu}_2(\text{OH})_3\text{NO}_3$  nanorods and nanobelts calcined in nitrogen environment at 600 °C at different heating rates. (a) & (c) at 2 °C  $\text{min}^{-1}$ ; (b) & (d) 10 °C  $\text{min}^{-1}$
